# Supplementary material
Source: MDPI journal article supplement (https://www.mdpi.com/2304-6767/11/12/267)
Supplement: s1 [file s1]

**Supplementary Table S1.** Measurement of pH from the biofilms.

| Conc. mg/ml | pH Value         |        |                    |        |
|-------------|------------------|--------|--------------------|--------|
|             | <i>S. mutans</i> |        | <i>S. gordonii</i> |        |
|             | Sucrose          | Stevia | Sucrose            | Stevia |
| 0           | 6.5              | 6.5    | 6.6                | 6.5    |
| 1           | 6.1              | 6.4    | 6.2                | 6.3    |
| 5           | 5.1              | 5.9    | 5.7                | 6.1    |
| 10          | 4.6              | 5.7    | 5.1                | 6.5    |
| 25          | 4.0              | 5.2    | 4.8                | 6.5    |

**Supplementary Table S2.** Exopolysaccharide production from the biofilms.

| <i>S. mutans</i>   |             |          |             |          |                   |             |          |          |          |
|--------------------|-------------|----------|-------------|----------|-------------------|-------------|----------|----------|----------|
| Sucrose<br>(mg/ml) | Mean pellet | SD       | Mean SUP*   | SD       | Stevia<br>(mg/ml) | Mean pellet | SD       | Mean SUP | SD       |
| 0                  | 100         | 0        | 100         | 0        | 0                 | 100         | 0        | 100      | 0        |
| 1                  | 117.6201035 | 4.222781 | 130.994898  | 9.199604 | 1                 | 51.58325842 | 2.74056  | 124.8304 | 3.453982 |
| 5                  | 112.7734664 | 3.493724 | 216.5072279 | 1.69862  | 5                 | 40.6365498  | 0.20307  | 114.2809 | 0.911467 |
| 10                 | 115.4988914 | 1.222934 | 141.7517007 | 0.120256 | 10                | 35.86429927 | 0.570361 | 136.9064 | 12.08894 |
| 25                 | 77.50739098 | 0.096685 | 117.0493197 | 5.351403 | 25                | 25.6168215  | 0.62157  | 128.5617 | 1.822935 |

  

| <i>S. gordonii</i> |             |          |             |          |                   |             |          |             |          |
|--------------------|-------------|----------|-------------|----------|-------------------|-------------|----------|-------------|----------|
| Sucrose<br>(mg/ml) | Mean pellet | SD       | Mean SUP    | SD       | Stevia<br>(mg/ml) | Mean pellet | SD       | Mean<br>SUP | SD       |
| 0                  | 100         | 0        | 100         | 0        | 0                 | 100         | 0        | 100         | 0        |
| 1                  | 100.5882353 | 17.4697  | 124.8303935 | 3.453982 | 1                 | 57.19245543 | 0.212418 | 114.3836    | 2.905918 |
| 5                  | 96.47058824 | 8.318903 | 114.2808684 | 0.911467 | 5                 | 65.95686004 | 3.245462 | 91.78082    | 0        |
| 10                 | 85.88235294 | 1.663781 | 136.9063772 | 12.08894 | 10                | 44.90938639 | 1.166556 | 99.31507    | 4.843197 |
| 25                 | 68.82352941 | 0.83189  | 128.5617368 | 1.822935 | 25                | 47.3702354  | 0.731274 | 93.83562    | 0.968639 |

\*SUP=Supernatant
